# Supplementary material for: Shape-selective synthesis of Bi2WO6 hierarchical structures and their morphology-dependent photocatalytic activities
Source: Royal Society of Chemistry journal article supplement (doi:10.1039/c6ra14493d), 2016-01-01
Supplement: c6ra14493d1.pdf [file c6ra14493d1.pdf]

## Supplementary Information

### Shape-selective synthesis of $\text{Bi}_2\text{WO}_6$ hierarchical structures and their morphology-dependent photocatalytic activities

Hua Lv,<sup>ab</sup> Yumin Liu,<sup>\*ab</sup> Jing Guang,<sup>ab</sup> Zhiwei Ding<sup>ab</sup> and Jianji Wang<sup>\*ab</sup>

<sup>a</sup>Collaborative Innovation Center of Henan Province for Green Manufacturing of Fine Chemicals, Key Laboratory of Green Chemical Media and Reactions, Ministry of Education, Henan Normal University, Xinxiang, Henan 453007, P. R. China.

<sup>b</sup>Henan Key Laboratory of Green Chemistry, School of Chemistry and Chemical Engineering, Henan Normal University, Xinxiang, Henan 453007, P. R. China

\* To whom correspondence should be addressed. Tel: +86 373 3326335; Fax: +86 373 3326336.

E-mail addresses: hualv2009@163.com (Y Liu), jwang@htu.cn (J Wang).

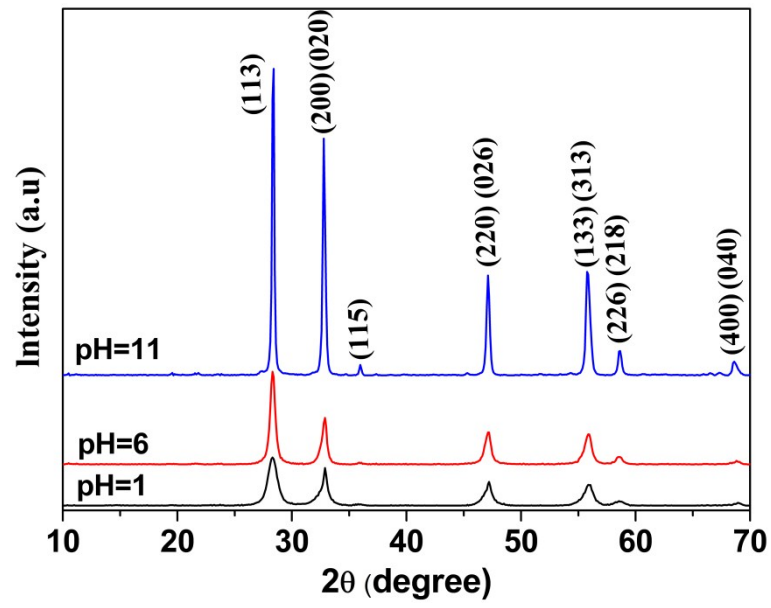

Fig. S1. XRD patterns of Bi<sub>2</sub>WO<sub>6</sub> samples synthesized at different pH values in the absence of L-lysine.

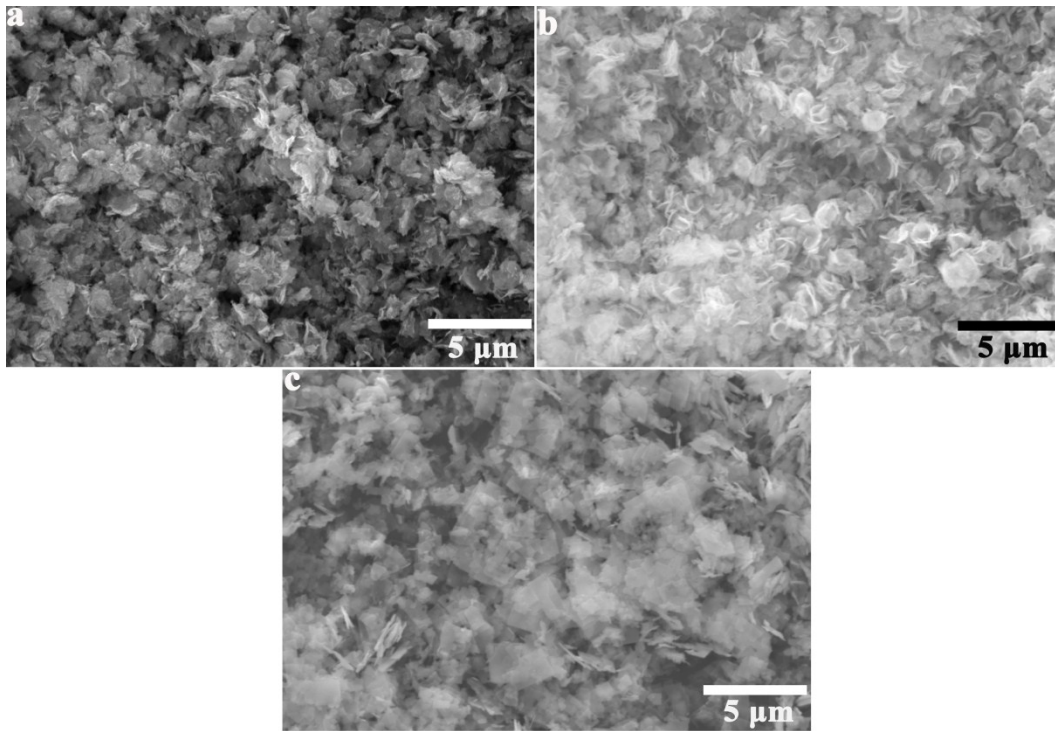

**Fig. S2.** SEM images of Bi<sub>2</sub>WO<sub>6</sub> samples synthesized at (a) pH = 1, (b) pH = 6, and (c) pH = 11 without using L-lysine.

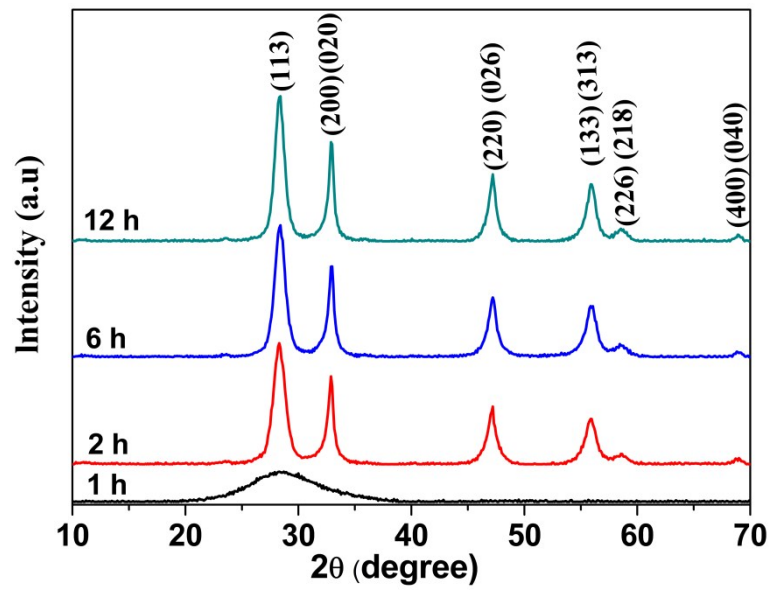

Fig. S3. XRD patterns of flower-like Bi<sub>2</sub>WO<sub>6</sub> microspheres prepared at different hydrothermal time.

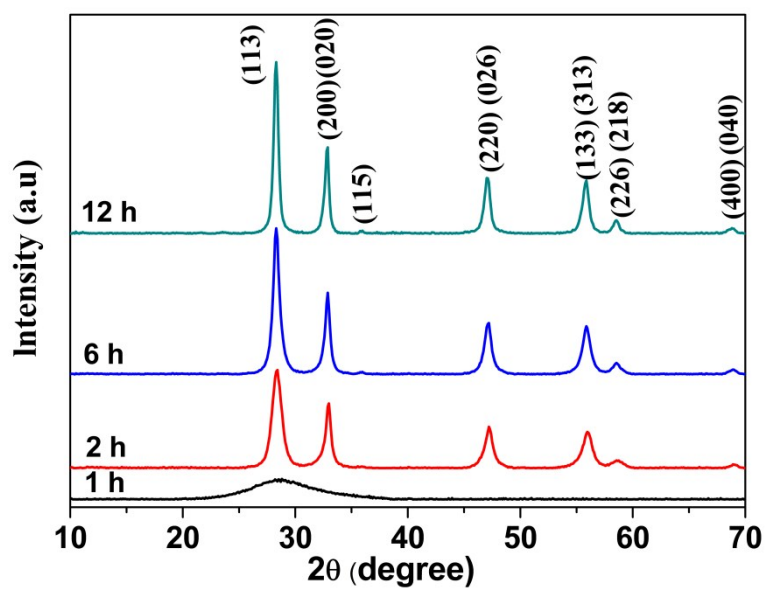

Fig. S4. XRD patterns of clew-like  $\text{Bi}_2\text{WO}_6$  microspheres prepared at different hydrothermal time.

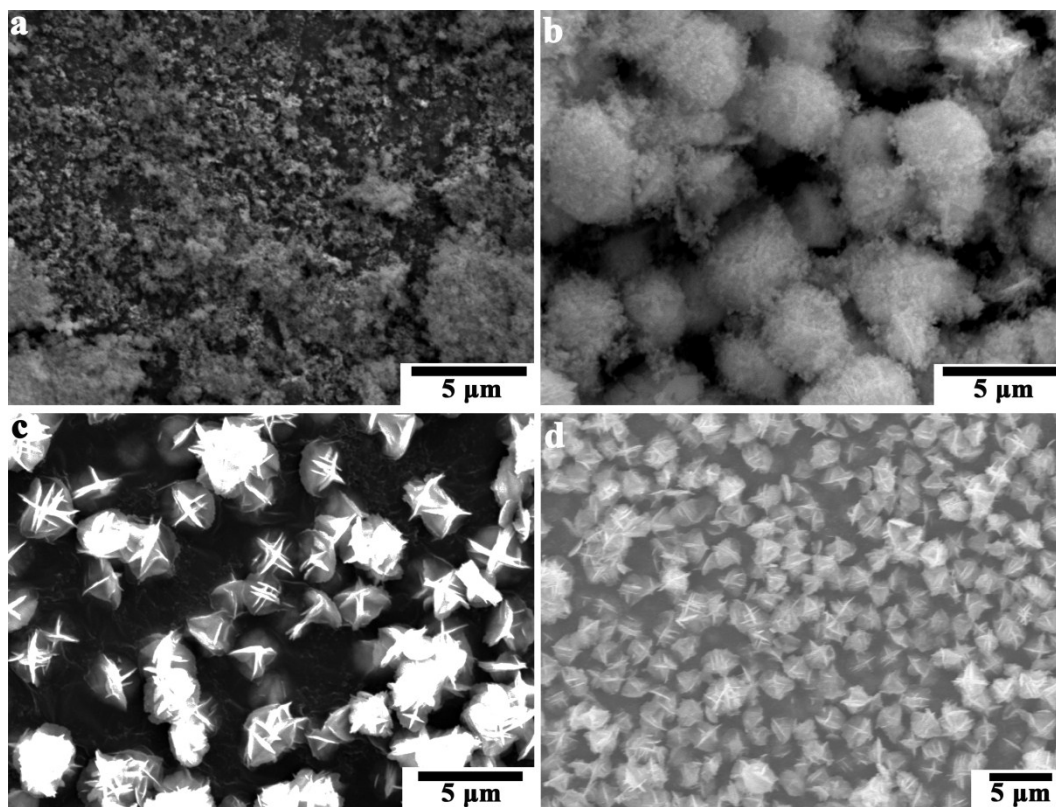

**Fig. S5.** SEM images of clew-like Bi<sub>2</sub>WO<sub>6</sub> microspheres prepared at different hydrothermal time:

(a) 1 h, (b) 2 h (c) 6 h (d) 12 h.

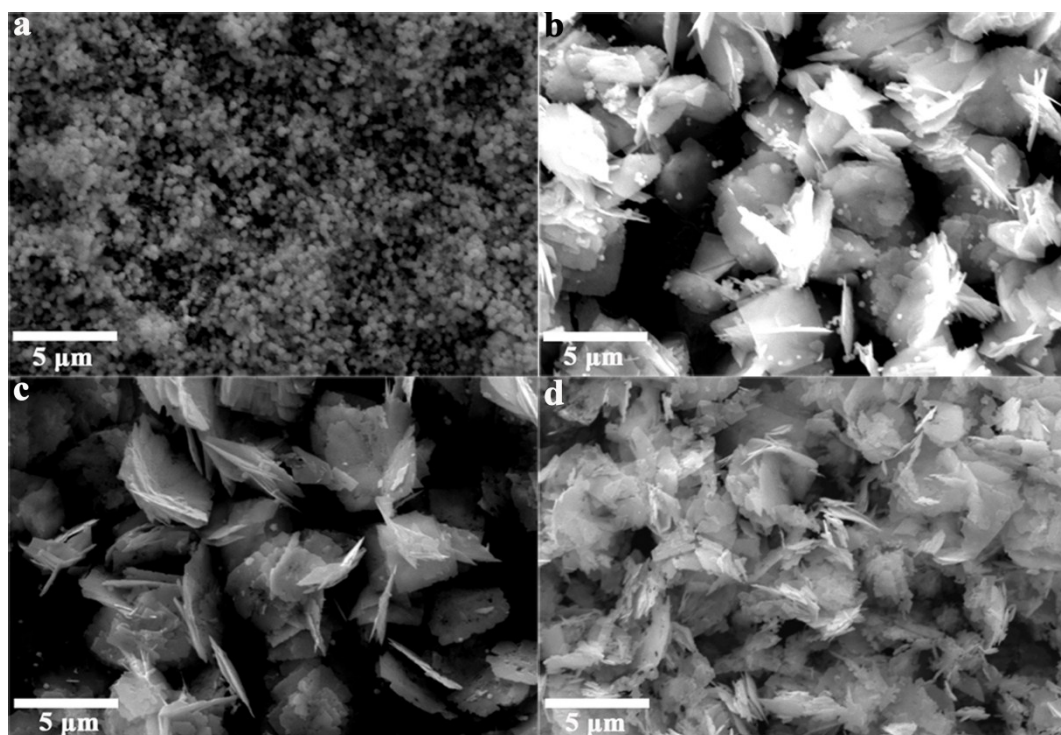

**Fig. S6.** SEM images of Bi<sub>2</sub>WO<sub>6</sub> nanoplates prepared at different hydrothermal time: (a) 1 h, (b) 2 h (c) 6 h (d) 12 h.

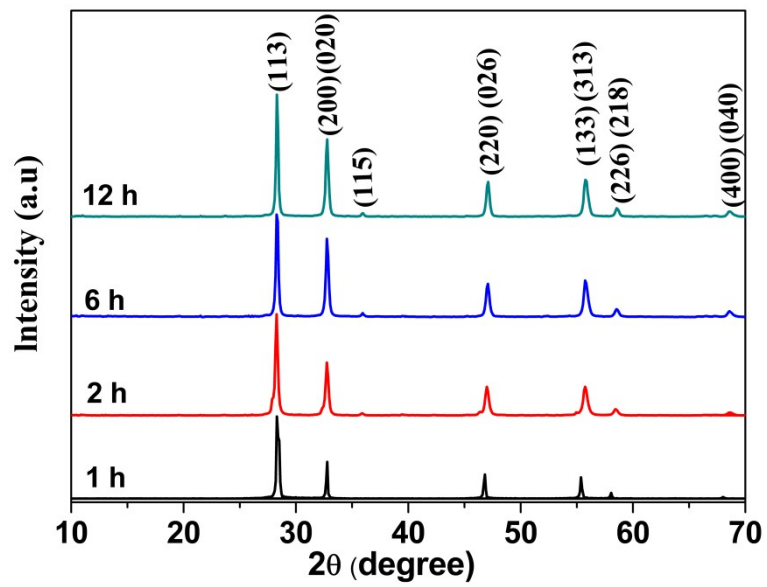

Fig. S7. XRD patterns of  $\text{Bi}_2\text{WO}_6$  nanoplates prepared at different hydrothermal time.



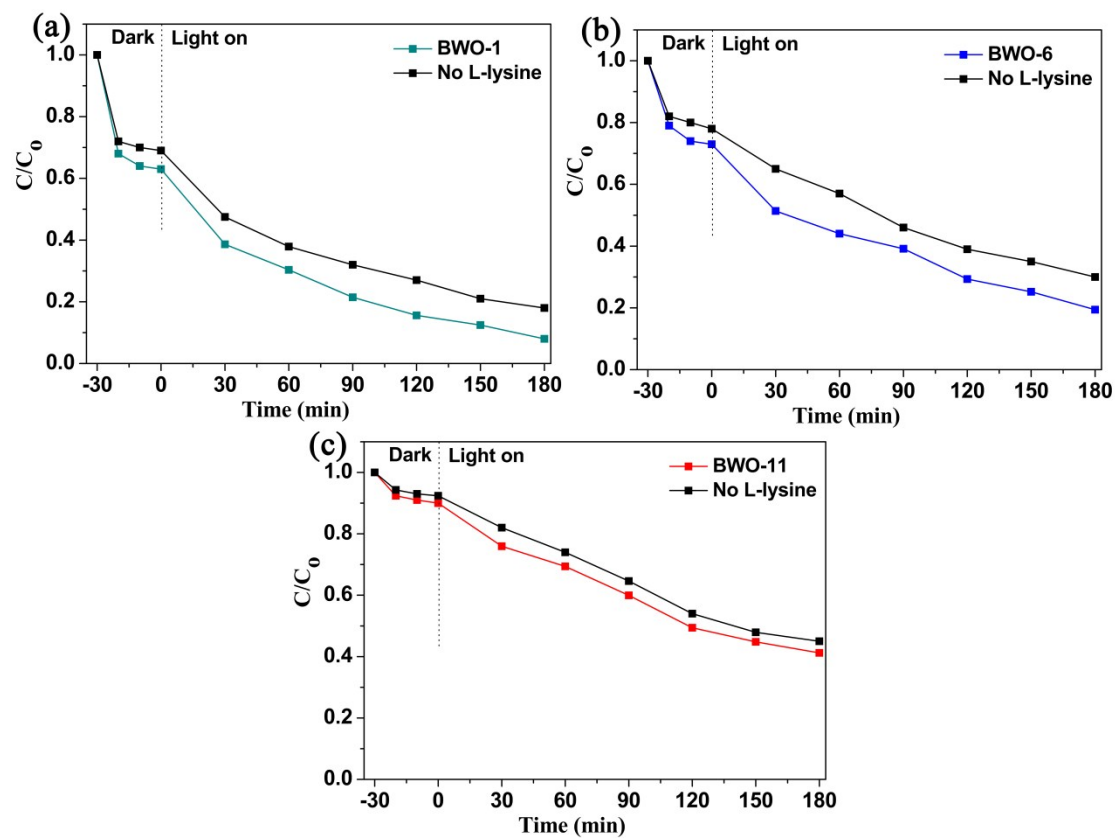

**Fig. S8.** Effects of L-lysine on the photocatalytic activities of Bi<sub>2</sub>WO<sub>6</sub> samples.

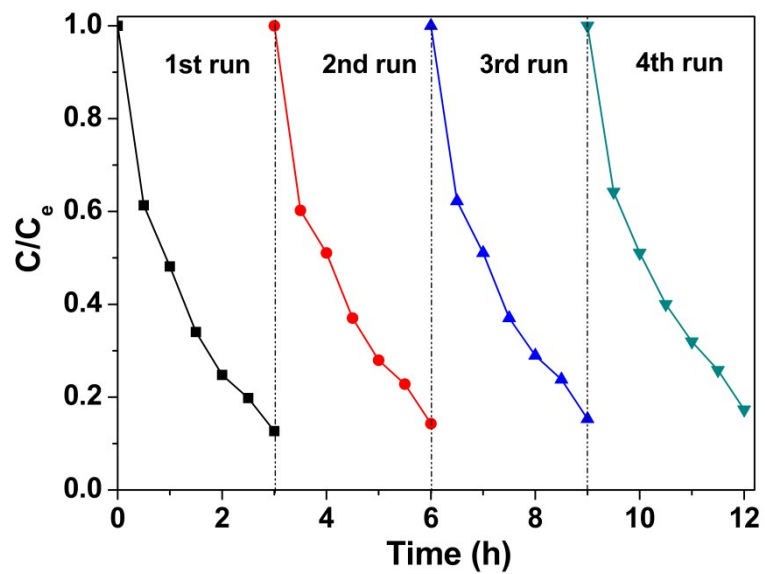

**Fig. S9.** Cycling runs of the flower-like  $\text{Bi}_2\text{WO}_6$  under visible light irradiation ( $C_e$  is the absorption of RhB when the adsorption-desorption equilibrium is reached).

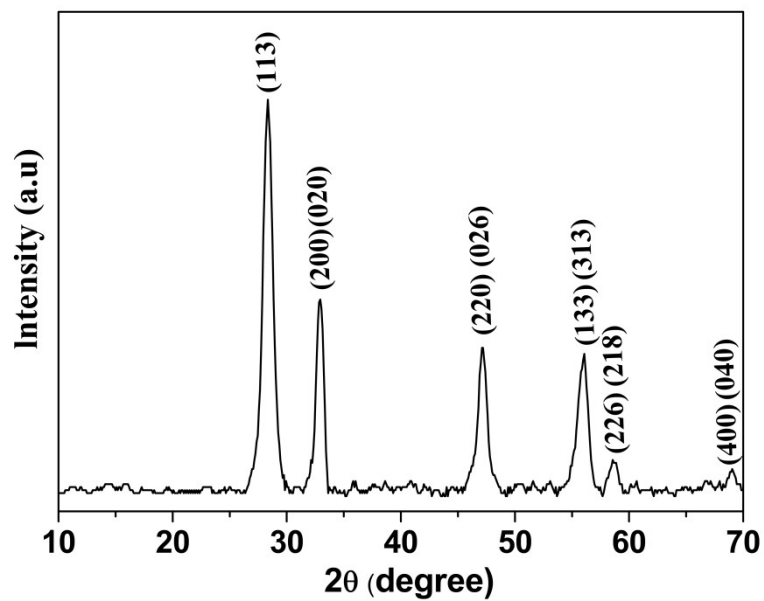

Fig. S10. XRD pattern of BWO-1 sample after four cycling runs.

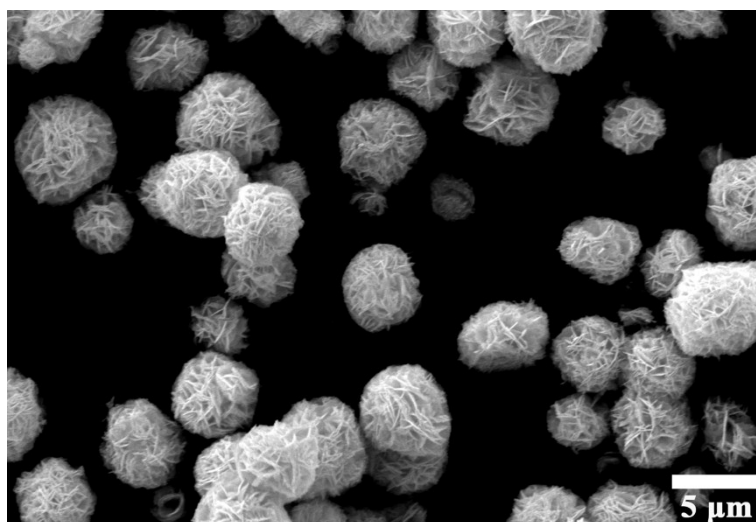

**Fig. S11.** SEM image of BWO-1 sample after four cycling runs.
